# Supplementary material
Source: Research Square preprint supplement (doi:10.21203/rs.3.rs-9451596/v1)
Supplement: Supplementary file 2 [file 732d7a01f14dd664d97fa03e.pdf]

## Appendix 1

### Appendix 1 – Search string and details of the searches, including number of studies

|                                                       |                                                                                                                                                                                                                                                                                                                                                                                                                                                                                                 |                                         |
|-------------------------------------------------------|-------------------------------------------------------------------------------------------------------------------------------------------------------------------------------------------------------------------------------------------------------------------------------------------------------------------------------------------------------------------------------------------------------------------------------------------------------------------------------------------------|-----------------------------------------|
| <b>Search string</b>                                  | (Prehabilitation* OR optimi* OR intervention* OR nutrition* (OR “Nutritional optimization”) OR exercise* OR physical activity* OR psychology OR psychological OR smoking)<br>AND (major surgery OR colon resection)<br>AND (Colon OR rectum OR colorect*)<br>AND (Cancer OR Neoplasm)<br>AND (“Quality of life” OR quality OR patient-reported outcome OR PRO OR PROM)<br><br><i>MESH-terms, index terms or similar specialized search methods were applied and modified for each database.</i> |                                         |
|                                                       | <b>Primary search</b><br>(28.08.2023)                                                                                                                                                                                                                                                                                                                                                                                                                                                           | <b>Secondary search</b><br>(17.10.2024) |
| <b>PubMed</b> - total number of records found         | 175                                                                                                                                                                                                                                                                                                                                                                                                                                                                                             | 10                                      |
| <b>PubPsych</b> - total number of records found       | 8                                                                                                                                                                                                                                                                                                                                                                                                                                                                                               | 2                                       |
| <b>CINAHL</b> - total number of records found         | 20                                                                                                                                                                                                                                                                                                                                                                                                                                                                                              | 1                                       |
| <b>EMBASE</b> - total number of records found         | 283                                                                                                                                                                                                                                                                                                                                                                                                                                                                                             | 23                                      |
| <b>Web of Science</b> - total number of records found | 135                                                                                                                                                                                                                                                                                                                                                                                                                                                                                             | 17                                      |
| <b>EBSCOhost</b> – total number of records found      | 12                                                                                                                                                                                                                                                                                                                                                                                                                                                                                              | 0                                       |
| <b>Total (after duplicates)</b>                       | 633                                                                                                                                                                                                                                                                                                                                                                                                                                                                                             | 53                                      |
