# Supplementary material
Source: Research Square preprint supplement (doi:10.21203/rs.3.rs-9451596/v1)
Supplement: Supplementary file 3 [file 8a7c483c94bc79153c3c3ebb.pdf]

| Characteristic                           | No. (%)                        |                                    |
|------------------------------------------|--------------------------------|------------------------------------|
|                                          | Intervention group<br>(n = 32) | Non-intervention group<br>(n = 31) |
| Age, median (IQR), years                 | 69.5 (64.8, 74.5)              | 75.0 (66.5, 80.0)                  |
| <b>Sex</b>                               |                                |                                    |
| Female                                   | 19 (59%)                       | 15 (48%)                           |
| Male                                     | 13 (41%)                       | 16 (52%)                           |
| BMI, median (IQR)                        | 25.8 (24.3-29.3)               | 25.2 (22.6-28.2)                   |
| <b>ASA group</b>                         |                                |                                    |
| ASA I-2                                  | 28 (88%)                       | 21 (68%)                           |
| ASA 3-4                                  | 4 (13%)                        | 10 (32%)                           |
| <b>Performance status</b>                |                                |                                    |
| PS 0                                     | 27 (84%)                       | 20 (65%)                           |
| PS 1-3                                   | 5 (16%)                        | 11 (35%)                           |
| <b>Smoking status</b>                    |                                |                                    |
| Active smoker                            | 3 (9%)                         | 1 (3%)                             |
| Previous smoker <sup>1</sup>             | 15 (47%)                       | 17 (55%)                           |
| Never smoked                             | 14 (44%)                       | 13 (42%)                           |
| <b>Weekly alcohol</b>                    |                                |                                    |
| <10 units weekly                         | 25 (78%)                       | 25 (81%)                           |
| ≥10 units weekly                         | 7 (22%)                        | 6 (19%)                            |
| <b>Tumour stage (UICC-stage)</b>         |                                |                                    |
| I/II                                     | 20 (62.5%)                     | 21 (67.7%)                         |
| III                                      | 12 (37.5%)                     | 8 (25.8%)                          |
| IV                                       | 0 (0%)                         | 2 (6.5%)                           |
| Days until surgery, median (IQR)         | 14.0 (13-16)                   | 18.0 (15-20)                       |
| <b>Surgery and follow-up</b>             |                                |                                    |
|                                          | Intervention group<br>(n = 32) | Non-intervention group<br>(n = 31) |
| <b>Type of surgery</b>                   |                                |                                    |
| Hemicolectomy dxt.                       | 22 (68.8 %)                    | 23 (74.2%)                         |
| Hemicolectomy sin.<br>or sigmoidectomy   | 10 (31.2 %)                    | 8 (25.8 %)                         |
| <b>Surgical technique</b>                |                                |                                    |
| Laparoscopic                             | 27 (84%)                       | 29 (94%)                           |
| Primary laparoscopic converted to open   | 5 (16%)                        | 2 (6.5%)                           |
| <b>Primary anastomosis or stoma</b>      |                                |                                    |
| Primary anastomosis                      | 30 (94%)                       | 30 (97%)                           |
| Stoma                                    | 2 (6%)                         | 1 (3%)                             |
| Length of stay (LOS), days, median (IQR) | 3.5 (3.0-8.3)                  | 4.0 (3.0-5.0)                      |
| Length of stay (LOS), days, mean (range) | 6.2 (3.0-19.0)                 | 5.6 (2.0-23.0)                     |

**Table 3** – Baseline, surgery and follow-up characteristics.

<sup>1</sup> No smoking in the previous 8 weeks
