# Supplementary material
Source: Research Square preprint supplement (doi:10.21203/rs.3.rs-9451596/v1)
Supplement: Supplementary file 5 [file fab2e40cdacfa24353d603b4.pdf]

| Time-point                                   | Gillis 2014           |                              | Gillis 2021           | Li 2012               |                              | Minella 2016             |                          |
|----------------------------------------------|-----------------------|------------------------------|-----------------------|-----------------------|------------------------------|--------------------------|--------------------------|
|                                              | Prehab (cases) n = 38 | Non-Prehab (controls) n = 39 | Prehab (cases) n = 55 | Prehab (cases) n = 42 | Non-Prehab (controls) n = 45 | Prehab 6MWD<400m. n = 36 | Prehab 6MWD>400m. n = 70 |
| <b>SF-36 TOTAL</b>                           |                       |                              |                       |                       |                              |                          |                          |
| Baseline                                     | .                     | .                            | 51.0 ± 22.0           | .                     | .                            | .                        | .                        |
| Pre-surgery                                  | .                     | .                            | 59.0 ± 19.0           | .                     | .                            | .                        | .                        |
| 1-month post-surgery                         | .                     | .                            | .                     | .                     | .                            | .                        | .                        |
| 2 months post-surgery                        | .                     | .                            | .                     | .                     | .                            | .                        | .                        |
| <b>SF-36: Physical function</b>              |                       |                              |                       |                       |                              |                          |                          |
| Baseline                                     | 72.9 ± 27.4           | 76.8 ± 22.1                  | <b>50 [30-75]</b>     | 82.0 ± 21.0           | .                            | .                        | .                        |
| Pre-surgery                                  | 73.5 ± 25.0           | 72.6 ± 29.7                  | <b>55 [35-70]</b>     | 80.0 ± 22.0           | 80.0 ± 24.0                  | .                        | .                        |
| 1-month post-surgery                         | 61.8 ± 31.6           | 62.1 ± 30.5                  | .                     | 64.0 ± 29.0           | 70.0 ± 28.0                  | .                        | .                        |
| 2 months post-surgery                        | 74.3 ± 26.1           | 72.3 ± 24.2                  | .                     | 73.0 ± 25.0           | 71.0 ± 31.0                  | .                        | .                        |
| <b>SF-36: Role physical</b>                  |                       |                              |                       |                       |                              |                          |                          |
| Baseline                                     | 52.9 ± 46.1           | 53.0 ± 49.6                  | <b>0 [0-88]</b>       | 71.0 ± 42.0           | .                            | .                        | .                        |
| Pre-surgery                                  | 62.3 ± 44.3           | 56.6 ± 50.4                  | <b>50 [0-100]</b>     | 74.0 ± 38.0           | 58.0 ± 43.0                  | .                        | .                        |
| 1-month post-surgery                         | 24.2 ± 42.3           | 15.8 ± 35.1                  | .                     | 37.0 ± 43.0           | 37.0 ± 43.0                  | .                        | .                        |
| 2 months post-surgery                        | 40.7 ± 45.6           | 35.0 ± 44.6                  | .                     | 58.0 ± 40.0           | 58.0 ± 40.0                  | .                        | .                        |
| <b>SF-36: Bodily pain</b>                    |                       |                              |                       |                       |                              |                          |                          |
| Baseline                                     | 68.1 ± 27.7           | 75.8 ± 24.6                  | <b>52 [41-84]</b>     | 78.0 ± 24.0           | .                            | .                        | .                        |
| Pre-surgery                                  | 74.7 ± 22.6           | 73.6 ± 25.3                  | <b>74 [52-100]</b>    | 77.0 ± 23.0           | 78.0 ± 29.0                  | .                        | .                        |
| 1-month post-surgery                         | 59.9 ± 30.7           | 64.1 ± 28.2                  | .                     | 67.0 ± 22.0           | 59.0 ± 24.0                  | .                        | .                        |
| 2 months post-surgery                        | 74.2 ± 24.7           | 73.2 ± 26.7                  | .                     | 75.0 ± 24.0           | 75.0 ± 24.0                  | .                        | .                        |
| <b>SF-36: General health</b>                 |                       |                              |                       |                       |                              |                          |                          |
| Baseline                                     | 62.0 ± 20.4           | 63.5 ± 10.9                  | 57.0 ± 38.0           | 72.0 ± 17.0           | .                            | .                        | .                        |
| Pre-surgery                                  | 66.4 ± 22.8           | 60.0 ± 25.8                  | 60.0 ± 21.0           | 75.0 ± 16.0           | 69.0 ± 24.0                  | .                        | .                        |
| 1-month post-surgery                         | 66.0 ± 19.3           | 64.9 ± 18.4                  | .                     | <b>75.0 ± 18.0</b>    | <b>65.0 ± 20.0</b>           | .                        | .                        |
| 2 months post-surgery                        | 65.7 ± 22.9           | 68.2 ± 19.5                  | .                     | 69.0 ± 17.0           | 66.0 ± 18.0                  | .                        | .                        |
| <b>SF-36: Vitality</b>                       |                       |                              |                       |                       |                              |                          |                          |
| Baseline                                     | 53.1 ± 19.9           | 59.6 ± 21.6                  | 45.0 ± 21.0           | 64.0 ± 21.0           | .                            | .                        | .                        |
| Pre-surgery                                  | 60.3 ± 22.7           | 59.2 ± 23.4                  | 56.0 ± 21.0           | <b>68.0 ± 20.0</b>    | <b>59.0 ± 23.0</b>           | .                        | .                        |
| 1-month post-surgery                         | 51.9 ± 25.4           | 53.6 ± 23.6                  | .                     | 61.0 ± 19.0           | 54.0 ± 22.0                  | .                        | .                        |
| 2 months post-surgery                        | 61.0 ± 21.8           | 62.6 ± 17.7                  | .                     | 65.0 ± 17.0           | 58.0 ± 21.0                  | .                        | .                        |
| <b>SF-36: Social functioning</b>             |                       |                              |                       |                       |                              |                          |                          |
| Baseline                                     | 71.0 ± 25.8           | 77.6 ± 21.2                  | <b>63 [38-88]</b>     | <b>88.0 ± 25.0</b>    | .                            | .                        | .                        |
| Pre-surgery                                  | 72.3 ± 28.8           | 75.4 ± 31.9                  | <b>63 [50-88]</b>     | 84.0 ± 27.0           | 69.0 ± 44.0                  | .                        | .                        |
| 1-month post-surgery                         | 53.2 ± 30.4           | 60.4 ± 26.5                  | .                     | 59.0 ± 46.0           | 59.0 ± 47.0                  | .                        | .                        |
| 2 months post-surgery                        | 75.6 ± 23.3           | 72.4 ± 27.3                  | .                     | 65.0 ± 17.0           | 58.0 ± 21.0                  | .                        | .                        |
| <b>SF-36: Role emotional</b>                 |                       |                              |                       |                       |                              |                          |                          |
| Baseline                                     | 69.5 ± 44.8           | 68.4 ± 38.8                  | <b>33 [0-100]</b>     | 58.0 ± 21.0           | .                            | .                        | .                        |
| Pre-surgery                                  | 62.8 ± 48.8           | 53.4 ± 49.8                  | <b>84 [0-100]</b>     | 82.0 ± 21.0           | 72.0 ± 26.0                  | .                        | .                        |
| 1-month post-surgery                         | 46.7 ± 53.9           | 46.3 ± 48.5                  | .                     | 72.0 ± 26.0           | 63.0 ± 32.0                  | .                        | .                        |
| 2 months post-surgery                        | 69.4 ± 38.6           | 52.9 ± 47.5                  | .                     | 79.0 ± 22.0           | 71.0 ± 28.0                  | .                        | .                        |
| <b>SF-36: Mental health</b>                  |                       |                              |                       |                       |                              |                          |                          |
| Baseline                                     | 67.8 ± 18.5           | 72.7 ± 15.4                  | 66.0 ± 18.0           | 77.0 ± 17.0           | .                            | .                        | .                        |
| Pre-surgery                                  | 71.6 ± 21.5           | 69.6 ± 24.8                  | 66.0 ± 21.0           | 77.0 ± 18.0           | 70.0 ± 23.0                  | .                        | .                        |
| 1-month post-surgery                         | 70.6 ± 17.5           | 70.6 ± 19.9                  | .                     | 76.0 ± 18.0           | 69.0 ± 21.0                  | .                        | .                        |
| 2 months post-surgery                        | 79.0 ± 16.1           | 72.4 ± 20.9                  | .                     | <b>79.0 ± 18.0</b>    | <b>70.0 ± 21.0</b>           | .                        | .                        |
| <b>SF-36: Physical component score (PCS)</b> |                       |                              |                       |                       |                              |                          |                          |
| Baseline                                     | .                     | .                            | 49.0 ± 21.0           | 47.0 ± 10.0           | .                            | <b>44.3 [39.4-51.6]</b>  | <b>53.2 [46.1-57.5]</b>  |
| Pre-surgery                                  | .                     | .                            | 57.0 ± 19.0           | 48.0 ± 8.0            | 47.0 ± 11.0                  | +0.5 [-2.2- 6.1]         | +1.3 [-0.7-5.2]          |
| 1-month post-surgery                         | .                     | .                            | .                     | 40.0 ± 8.0            | 40.0 ± 9.0                   | -2.0 [14.8-6.0]          | -8.0 [-13.3-2.0]         |
| 2 months post-surgery                        | .                     | .                            | .                     | 44.0 ± 11.0           | 44.0 ± 12.0                  | +0.3 [-5.8-8.4]          | +2.2 [-2.7-8.0]          |
| <b>SF-36: Mental component score (MCS)</b>   |                       |                              |                       |                       |                              |                          |                          |
| Baseline                                     | .                     | .                            | 54.0 ± 23.0           | 51.0 ± 10.0           | .                            | 50.3 [43.9-59.9]         | 51.9 [44.7-58.8]         |
| Pre-surgery                                  | .                     | .                            | 59.0 ± 21.0           | <b>50.0 ± 10.0</b>    | <b>45.0 ± 14.0</b>           | +1.5 [-3.0-3.6]          | +1.9 [-1.6-6.9]          |
| 1-month post-surgery                         | .                     | .                            | .                     | 44.0 ± 14.0           | 44.0 ± 14.0                  | -4.0 [-10.8-6.0]         | -0.6 [-8.8-5.2]          |
| 2 months post-surgery                        | .                     | .                            | .                     | <b>51.0 ± 10.0</b>    | <b>46.0 ± 11.0</b>           | +2.7 [-7.0-8.2]          | +4.9 [-2.5-11.0]         |

**Table 2:** QoL outcomes using SF-36. mean values ±SD. The **green** columns indicate results for patients in a prehabilitation group. **Red** text = median values [IQR]. **Bold** text indicates that results were statistically significant.
